# Supplementary material
Source: PubMed Central journal article supplement (PMC4970510)
Supplement: jm5b01998_si_001.pdf [file jm5b01998_si_001.pdf]

**Supporting Information:****Purine (N)-Methanocarba Nucleoside Derivatives Lacking an Exocyclic Amine as Selective A<sub>3</sub> Adenosine Receptor Agonists**

Dilip K. Tosh, Antonella Ciancetta, Eugene Warnick, Robert O'Connor, Zhoumou Chen, Elizabeth Gizewski, Steven Crane, Zhan-Guo Gao, John A. Auchampach, Daniela Salvemini, and Kenneth A. Jacobson

| <b>Contents:</b>                                                              | <b>Page</b> |
|-------------------------------------------------------------------------------|-------------|
| Synthesis – Schemes S1 and S2                                                 | S2          |
| Binding to off-target sites (Figure S1)                                       | S3          |
| Modeling Per Residue Interaction (Figure S2)                                  | S4          |
| NMR structural assignment of compounds <b>32a</b> , <b>12</b> , and <b>15</b> | S5-S10      |
| Selected NMR and mass spectra                                                 | S11-S16     |

**Scheme S1.** A proposed mechanism for the unexpected formation of 6-Me purine derivatives.

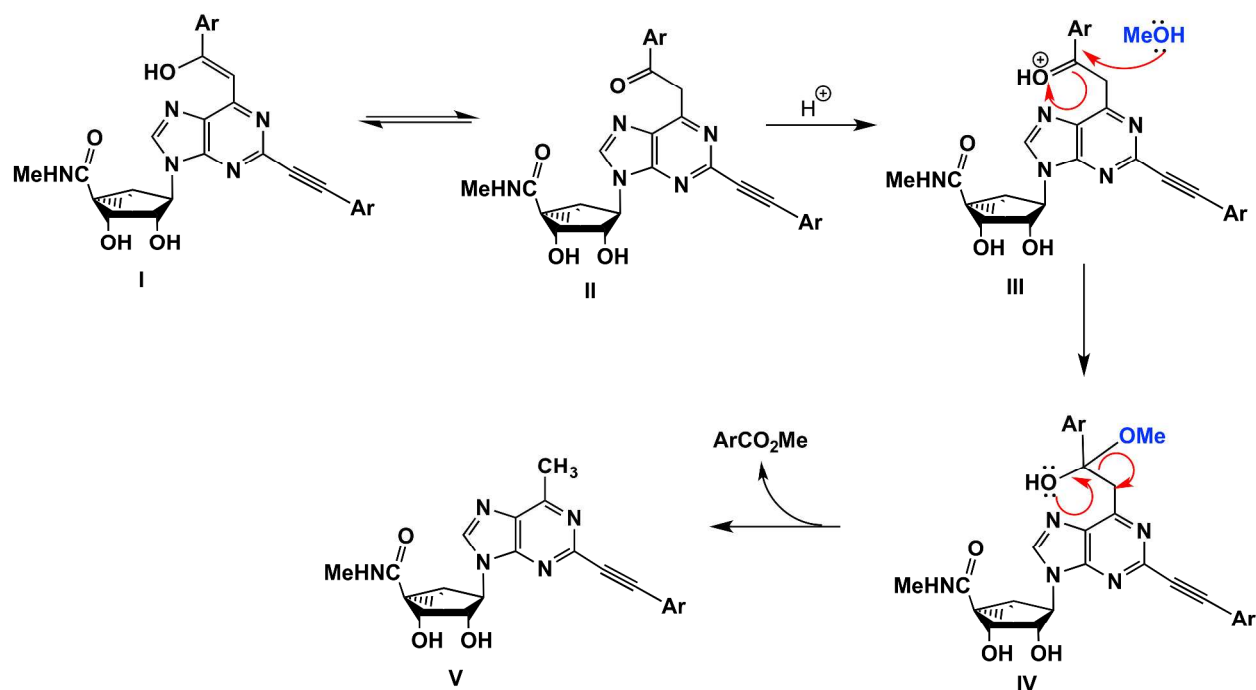

**Scheme S2.** Reagents and Conditions: (i) isoamyl nitrite, iodine,  $CH_2I_2$ , CuI, THF, reflux; (ii) TFA, reflux.

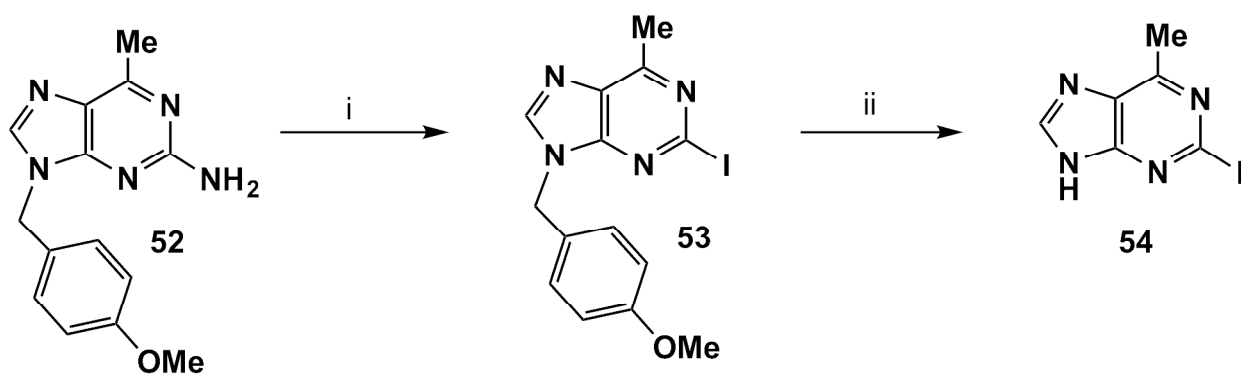

## Binding to off-target sites

$K_i$  determinations and binding profiles in a broad screen of receptors and channels were generously provided by the National Institute of Mental Health's Psychoactive Drug Screening Program, Contract # HHSN-271-2008-00025-C (NIMH PDSP). The NIMH PDSP is Directed by Bryan L. Roth MD, PhD at the University of North Carolina at Chapel Hill and Project Officer Jamie Driscoll at NIMH, Bethesda MD, USA. For experimental details please refer to the PDSP web site <http://pdsp.med.unc.edu/> and click on "Binding Assay" or "Functional Assay" on the menu bar.

**Figure S1.** Radioligand binding at (A) the human dopamine transporter (hDAT); compound 33256 = Compound **15**; (B) the human d-opioid receptor (hDOR); compound 40132 = Compound **19**.

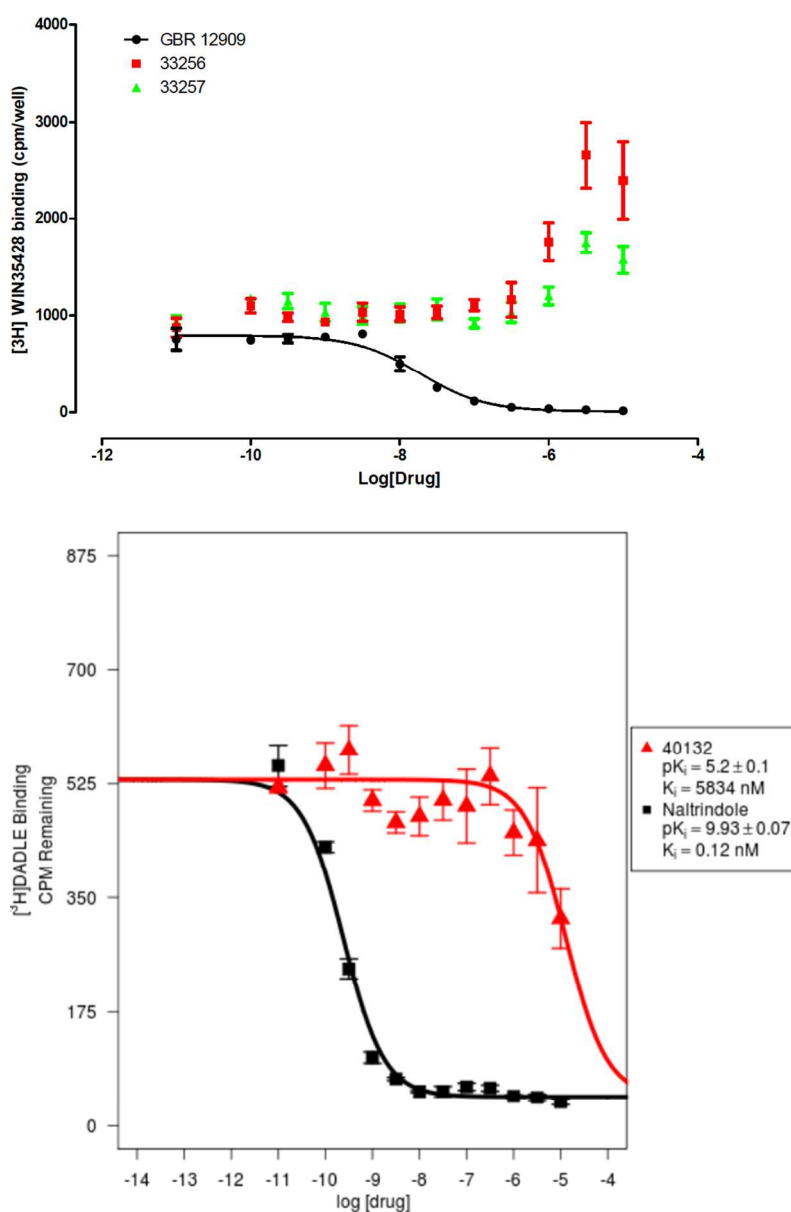

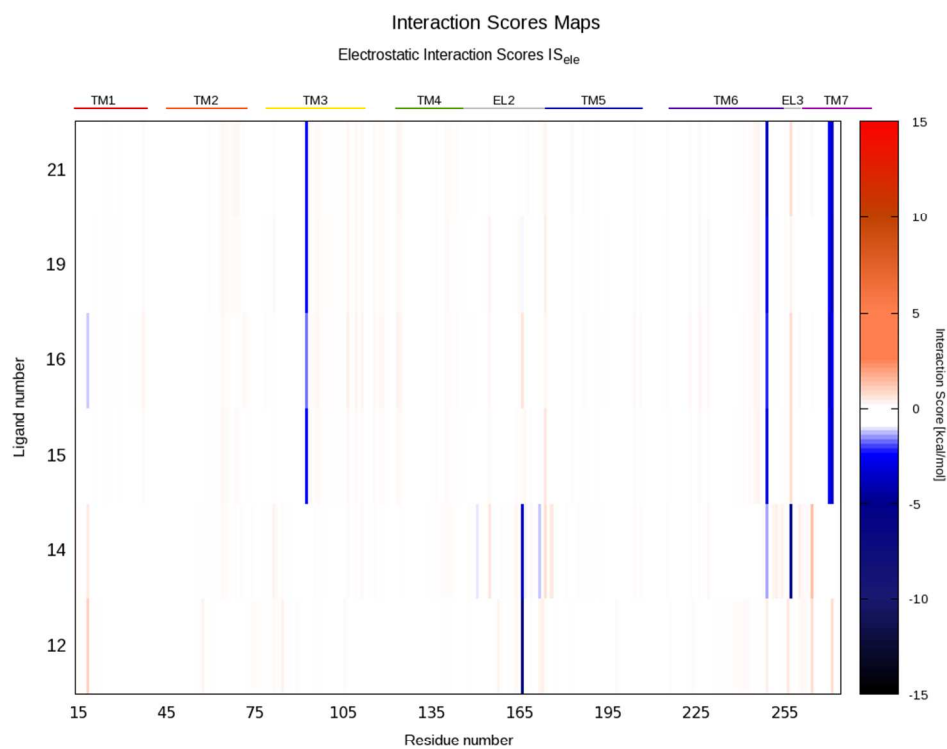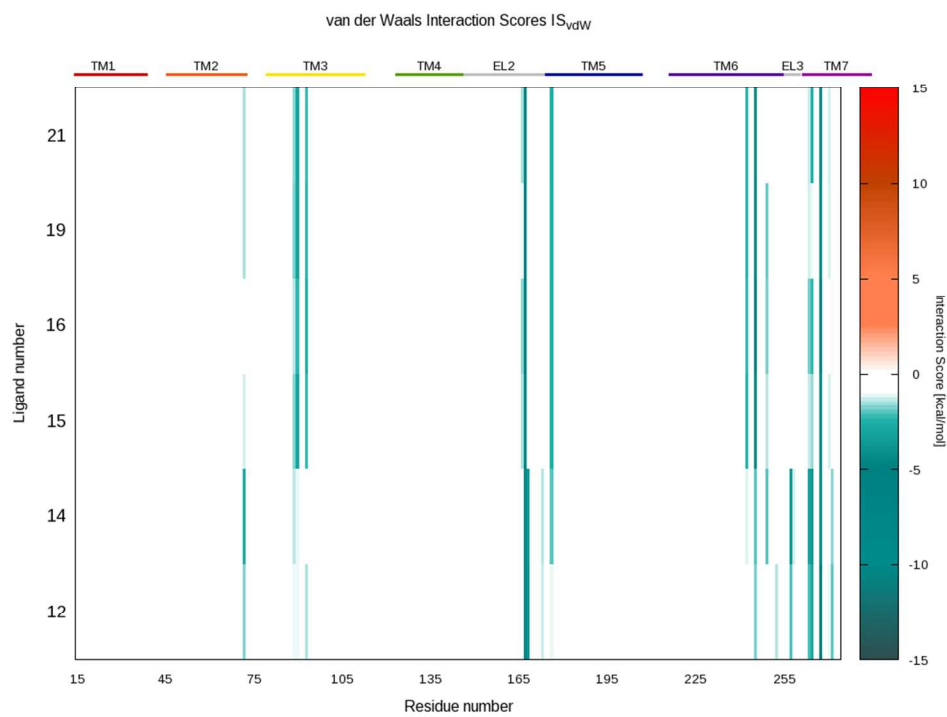

**Figure S2.** Per residue  $IS_{ele}$  (panel A) and  $IS_{vdw}$  (panel B) maps for the most energetically favorable docking poses of compounds with  $K_i < 100$  nM. The maps have been computed for selected poses of the considered compound inside the putative binding site of hA<sub>3</sub> AR. Values are expressed in kcal/mol.

**Figure S3. Representative structure for compounds 32a, 12, and 15** (shift data given in Tables S1, S2 and S3).

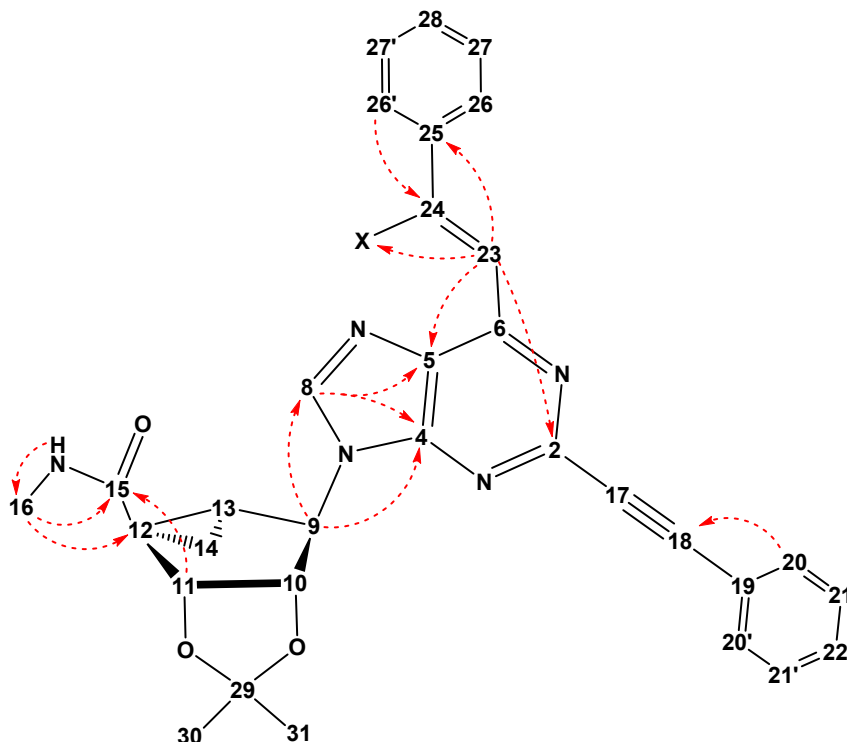

**Table S1. Compound 32a, 298K, CDCl<sub>3</sub> ( $\delta H = 7.24$ ,  $\delta C$  77.2 ppm)**

| #  | $\delta H$ , multiplicity: $J$ Hz | $\delta C$ | HMBC coupling to #       |
|----|-----------------------------------|------------|--------------------------|
| 2  |                                   | 158.0      |                          |
| 4  |                                   | 148.0      |                          |
| 5  |                                   | 128.2      |                          |
| 6  |                                   | 145.5      |                          |
| 8  | 7.82                              | 141.5      | 2, 4, 5                  |
| 9  | 4.82                              | 61.8       | 4, 8, 10, 11, 12, 13, 14 |
| 10 | 4.85, dd:7.1:1.4                  | 89.6       | 12, 13                   |
| 11 | 5.78, dd:7.1:0.8                  | 83.9       | 9, 12, 14, 15, 29        |
| 12 |                                   | 42.1       |                          |

|    |                                                |               |                                        |
|----|------------------------------------------------|---------------|----------------------------------------|
| 13 | 1.97, ddd:9.4:5.1:1.5                          | 35.6          | 10, 11, 15                             |
| 14 | 1.66, ddd: 9.4:5.1:1.4<br>1.28, t:5.2          | 15.1          | 9, 11, 12, 13, 15<br>9, 11, 12, 13, 15 |
| 15 | NH=7.37, q:5.1                                 | 171.2         | 15, 16                                 |
| 16 | 2.81, d:4.8                                    | 27.5          | 12, 15                                 |
| 17 |                                                | 89.7          |                                        |
| 18 |                                                | 85.2          |                                        |
| 19 |                                                | 122.2         |                                        |
| 20 | 7.66                                           | 132.7         | 18, 20, 22                             |
| 21 | 7.41                                           | 129.1         | 19, 20                                 |
| 22 | 7.42                                           | 129.9         | 20                                     |
| 23 | 5.77                                           | 89.1          | X(CH <sub>3</sub> ), 2, 5, 6, 21, 25   |
| 24 | NH=10.24, q:5.0<br>CH <sub>3</sub> =3.0, d:5.4 | 163.6<br>32.6 | 23, 24(CH <sub>3</sub> ), 25<br>24     |
| 25 |                                                | 136.9         |                                        |
| 26 | 7.46                                           | 128.5         | 24, 26, 27, 28                         |
| 27 | 7.42                                           | 128.8         | 25, 26                                 |
| 28 | 7.41                                           | 129.6         | 26                                     |
| 29 |                                                | 113.2         |                                        |
| 30 | 1.28                                           | 24.8          | 29, 31                                 |
| 31 | 1.55                                           | 26.5          | 29, 30                                 |

**Table S2. Compound 12, 298K, DMSO ( $\delta\text{H}$  =2.5,  $\delta\text{C}$ =39.5 ppm)**

| #  | $\delta\text{H}$ , multiplicity:J Hz | $\delta\text{C}(\text{OH})$ , $\delta\text{C}(\text{C}=\text{O})$ | HMBC coupling to #          |
|----|--------------------------------------|-------------------------------------------------------------------|-----------------------------|
| 2  |                                      | 154.5, 156.0                                                      |                             |
| 4  |                                      | 148.8, 150.4                                                      |                             |
| 5  |                                      | 126.4, 132.4                                                      |                             |
| 6  |                                      | 141.1, 144.6                                                      |                             |
| 8  | 8.53                                 | 143.6, 145.3                                                      | 2, 4, 5                     |
| 9  | 4.85                                 | 61.4, 61.5                                                        | 4, 8, 10, 11, 12, 13, 14    |
| 10 | 4.03, bt<br>OH=5.46                  | 76.3                                                              | 9, 12, 13<br>9, 10, 11      |
| 11 | 5.01, t:6.3<br>OH=4.86               | 70.9                                                              | 9, 12, 14, 15<br>10, 11, 12 |

|    |                                       |              |                                                |
|----|---------------------------------------|--------------|------------------------------------------------|
| 12 |                                       | 37.9         |                                                |
| 13 | 1.94, dd:9.0:4.6                      | 27.5         | 10, 11, 12, 14, 15                             |
| 14 | 1.35, ddd: 9.0:4.6:1.5<br>1.65, t:4.6 | 13.9         | 9, 11, 12, 13, 14, 15<br>9, 11, 12, 13, 14, 15 |
| 15 | NH=7.59                               | 171.1        | NH=15, 16                                      |
| 16 | 2.68                                  | 26.1         | 12, 15                                         |
| 17 |                                       | 86.89, 88.9  |                                                |
| 18 |                                       | 86.94, 85.2  |                                                |
| 19 |                                       | 120.2, 120.8 |                                                |
| 20 | 7.76, dm:6.7                          | 132.2, 132.0 | 18, 20, 21, 22                                 |
| 21 | 7.53                                  | 128.9        | 20, 21                                         |
| 22 | 7.55                                  | 130.2, 129.8 | 20, 22                                         |
| 23 | 6.76                                  | 88.0, 42.8   | 2, 6, 24, 25, 26                               |
| 24 | OH: 4.93                              | 170.3, 194.5 | OH: 2, 5, 24                                   |
| 25 |                                       | 135.0, 136.2 |                                                |
| 26 | 7.99                                  | 126.0, 128.4 | 24, 25, 26, 27, 28                             |
| 27 | 7.53, dm:7.4                          | 128.8        |                                                |
| 28 | 7.56                                  | 131.0, 133.6 |                                                |

**Table S3. Compound 15, 298K, MeOD ( $\delta\text{H}$  =3.31,  $\delta\text{C}$ =49.2 ppm)**

| #  | $\delta\text{H}$ , multiplicity:J Hz  | $\delta\text{C}$ | HMBC coupling to #                     |
|----|---------------------------------------|------------------|----------------------------------------|
| 2  |                                       | 160.8            |                                        |
| 4  |                                       | 151.8            |                                        |
| 5  |                                       | 133.5            |                                        |
| 6  |                                       | 147.2            |                                        |
| 8  | 8.51                                  | 146.5            | 2, 4, 5, 6, 9, 17                      |
| 9  | 4.99                                  | 64.2             | 4, 8, 10, 11, 12, 13, 14               |
| 10 | 4.10, dt:6.6:0.9                      | 77.9             | 9, 12, 13, 14                          |
| 11 | 5.14, dd:6.3:1.3                      | 73.5             | 9, 10, 12, 14, 15                      |
| 12 |                                       | 39.9             |                                        |
| 13 | 2.14, ddd:9.0:4.9:1.3                 | 28.9             | 10, 11, 12, 14, 15                     |
| 14 | 1.40, ddd: 9.0:5.1:1.7<br>1.87, t:4.9 | 15.5             | 9, 11, 12, 13, 15<br>9, 11, 12, 13, 15 |

|    |      |       |                    |
|----|------|-------|--------------------|
| 15 |      | 174.9 |                    |
| 16 | 2.84 | 27.3  | 12, 15             |
| 17 |      | 89.3  |                    |
| 18 |      | 87.6  |                    |
| 19 |      | 123.1 |                    |
| 20 | 7.68 | 133.5 | 18, 19, 20, 21, 22 |
| 21 | 7.46 | 130.1 | 19, 20, 21         |
| 22 | 7.47 | 131.1 | 20, 21             |
| 23 | 2.81 | 19.3  | 2, 6, 17, 20       |



Figure S4. HMBC spectrum of **15**.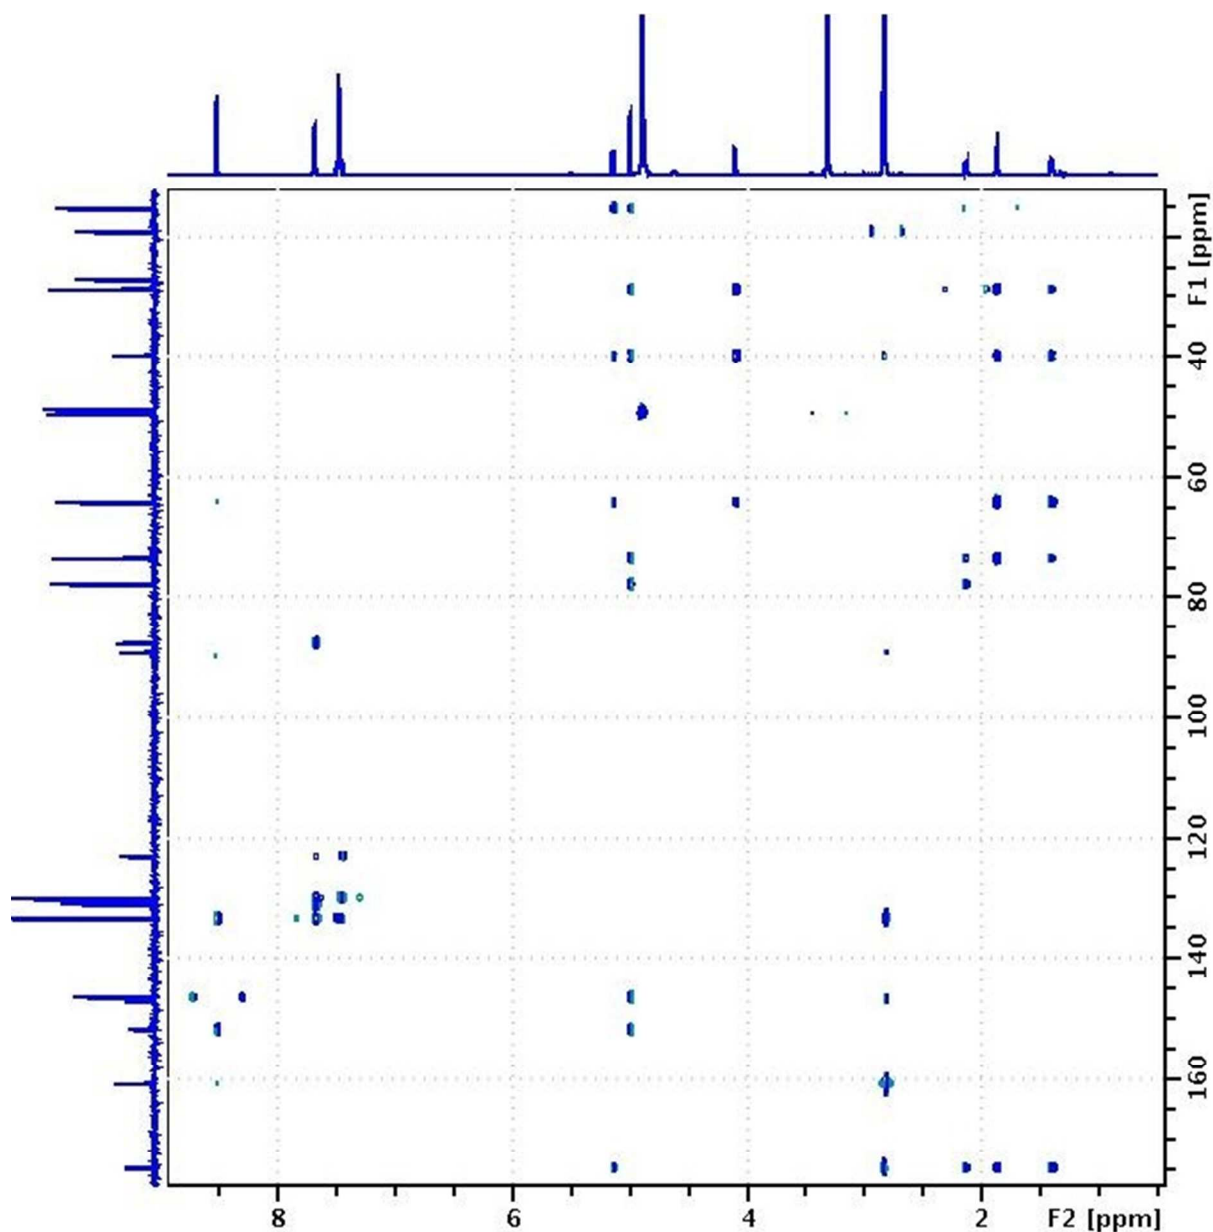

Most protonated carbon and  $^1\text{H}$ -spin system assignments were relatively straightforward via HSQC and COSY/TOCSY, respectively, for **32a** and **15**, with  $^{13}\text{C}$ -coupled and HMBC experiments providing additional information for overlapping resonances such as **15**'s #5 and #20 carbons. HMBC also provided the remaining pertinent information for the quaternary carbons. Notably, the purine #8 proton of **12** coupled to each  $^{13}\text{C}$  in its ring and to that of the

#17 acetylene carbon. The structurally important couplings are shown with arrows in Figure S4, with all couplings listed in Tables S1-S3.

Compound **12** was a keto/enol mixture that was not exchanging on the chemical shift time scale. The  $^{13}\text{C}$ -shift column in Table 2 shows the enol resonances first (major component, 60%) and then the keto resonances if they were assignable. Every aromatic  $^{13}\text{C}$  and  $^1\text{H}$  resonance as well as #9 shifted with tautomerization. Figures S5A and S5B show the  $^1\text{H}$  and  $^{13}\text{C}$  DMSO spectra of **12**, with examples of the enol/keto shifts in the insets.

**Figure S5A. Compound 12  $^1\text{H}$  spectra in DMSO- $d_6$**

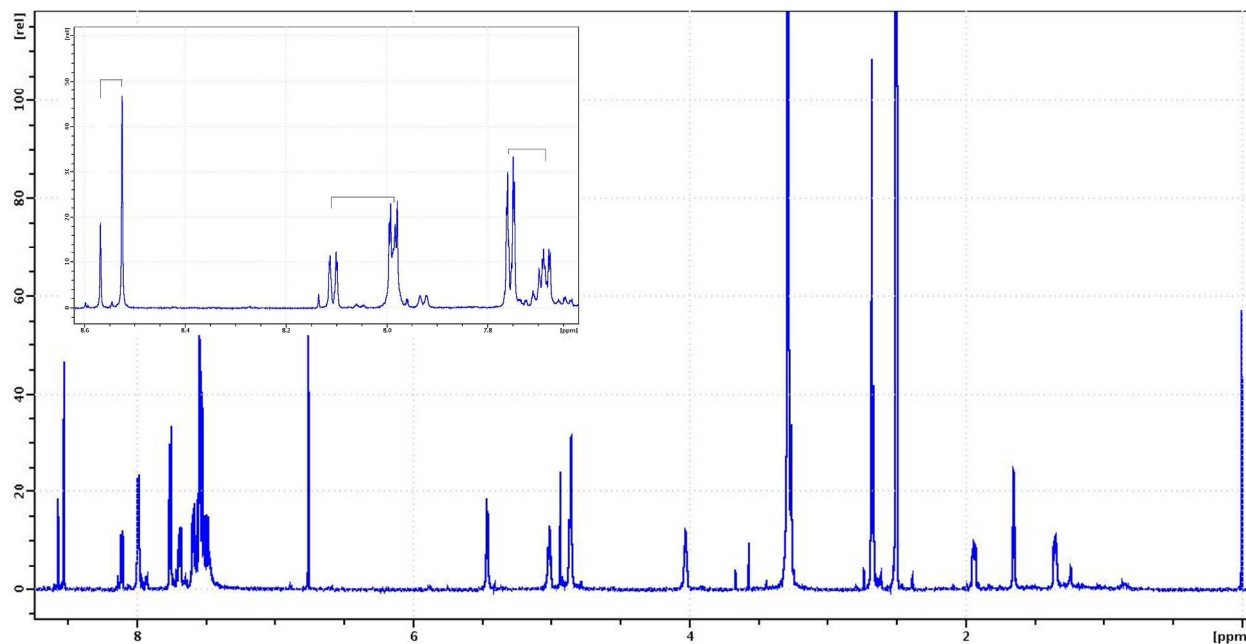

Figure S5B. Compound 12  $^{13}\text{C}$  spectra in DMSO- $d_6$ .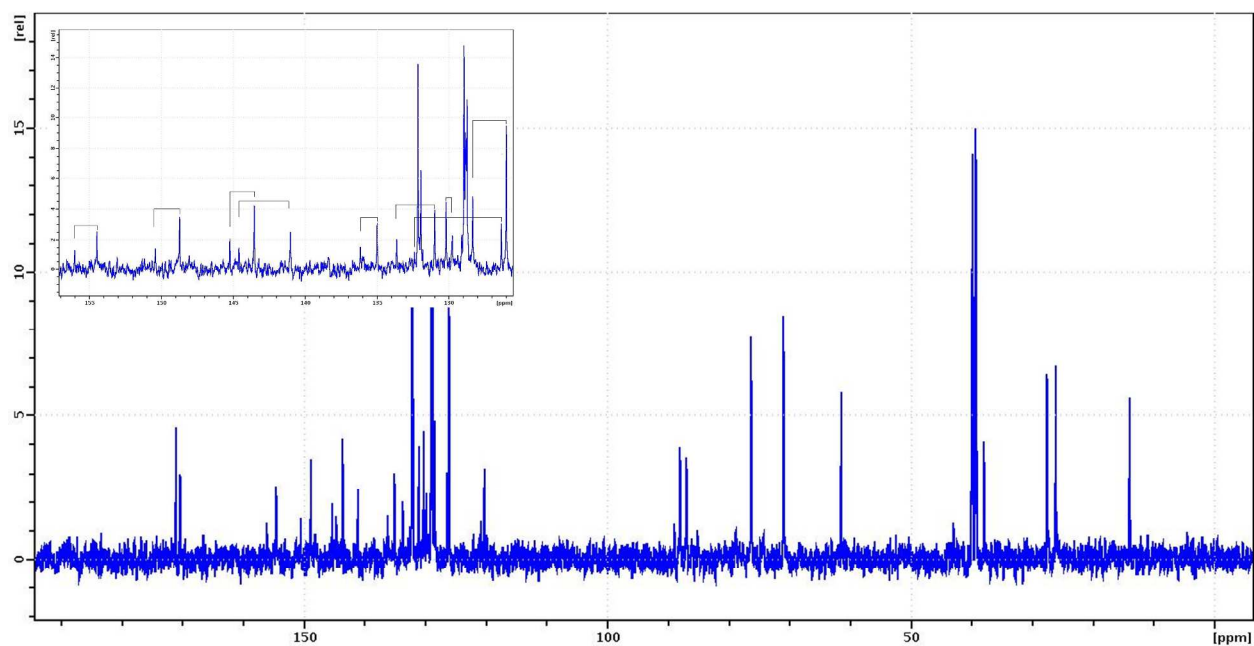

## Selected NMR and mass spectra

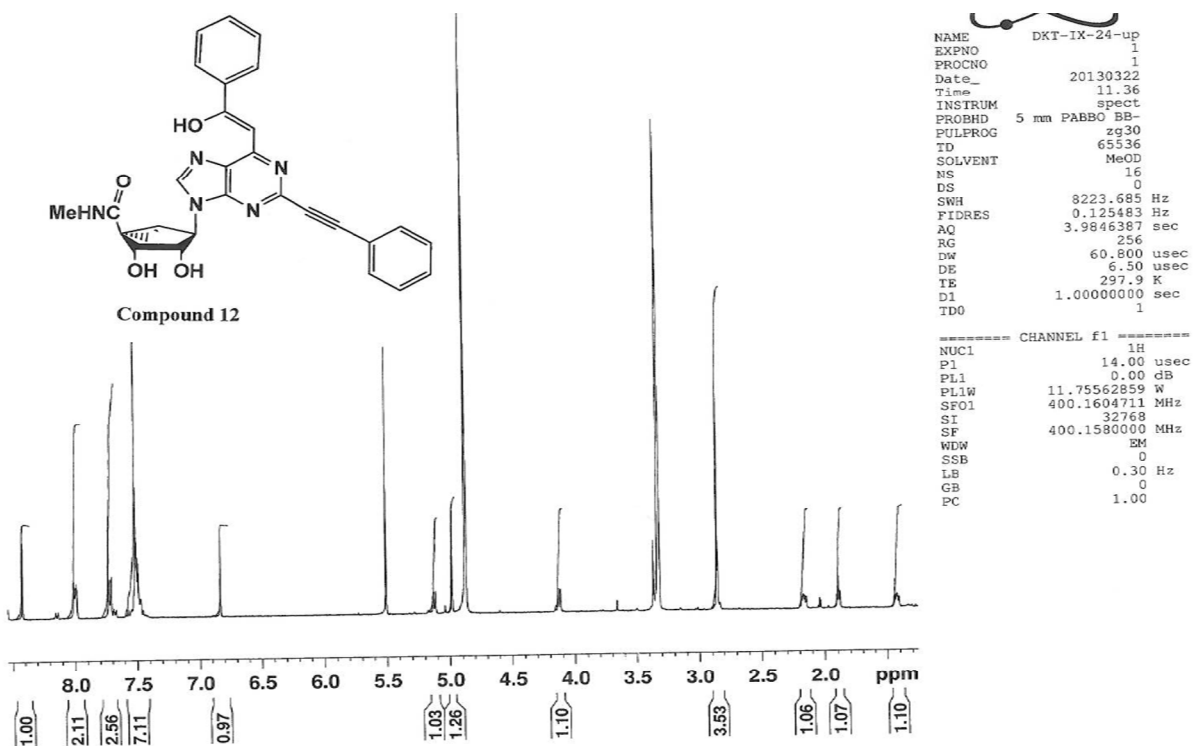

Monoisotopic Mass, Even Electron Ions  
 376 formula(e) evaluated with 6 results within limits (up to 50 best isotopic matches for each mass)  
 Elements Used:  
 C: 0-500 H: 0-1000 N: 0-6 O: 0-8  
 09-May-2013 13:19:40  
 TOF MS ES+

dkf-ix-25-up 80 (1.361) AM (Top,6, H1,10000.0,0.00,1.00); Sm (SG, 2x3.00)

2.04e+002

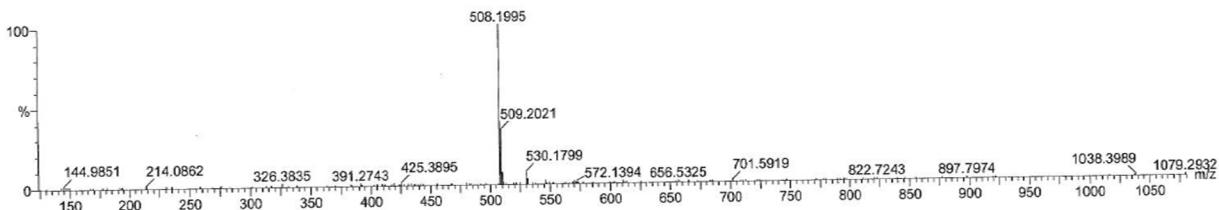

Minimum: -1.5  
 Maximum: 12.0 10.0 50.0

| Mass     | Calc. Mass | mDa  | PPM   | DBE  | i-FIT | Formula       |
|----------|------------|------|-------|------|-------|---------------|
| 508.1995 | 508.1985   | 1.0  | 2.0   | 19.5 | 0.1   | C29 H26 N5 O4 |
|          | 508.1971   | 2.4  | 4.7   | 14.5 | 0.2   | C28 H30 N O8  |
|          | 508.2025   | -3.0 | -5.9  | 23.5 | 0.5   | C34 H26 N3 O2 |
|          | 508.2084   | -8.9 | -17.5 | 14.5 | 0.6   | C27 H30 N3 O7 |
|          | 508.1913   | 8.2  | 16.1  | 23.5 | 0.8   | C35 H26 N O3  |
|          | 508.2065   | -7.0 | -13.8 | 27.5 | 2.1   | C39 H26 N     |

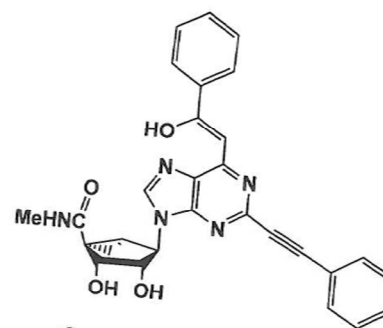

Compound 12

DKF-X-30

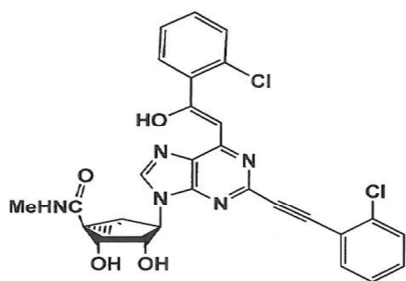

Compound 13

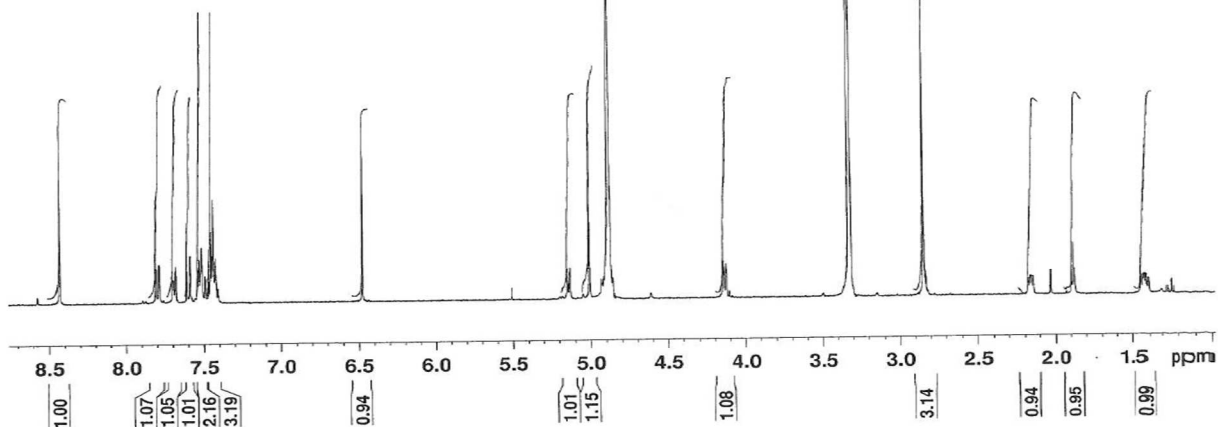

Monoisotopic Mass, Even Electron Ions  
 137 formula(e) evaluated with 4 results within limits (up to 50 closest results for each mass)  
 Elements Used:  
 C: 4-100 H: 0-150 N: 5-5 O: 0-20 Cl: 2-2  
 13-Sep-2013  
 dkt-x-30 24 (0.408) AM (Cen,11, 50.00, Ht,10000.0,0.00,1.00); Sm (SG, 3x5.00)

TOF MS ES+  
 1.33e+012

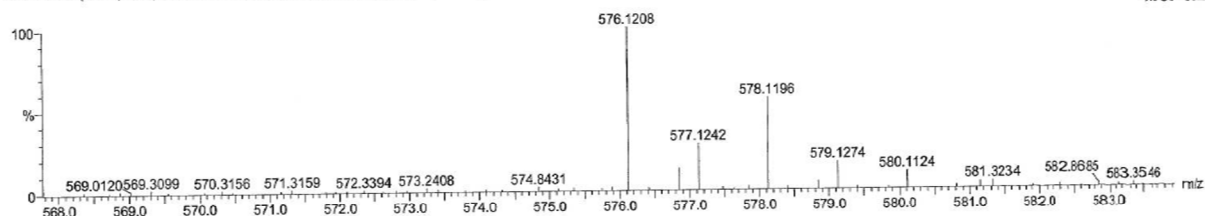

| Mass     | Calc. Mass | mDa  | PPM  | DBE  | i-FIT | Formula            |
|----------|------------|------|------|------|-------|--------------------|
| 576.1208 | 576.1205   | 0.3  | 0.5  | 19.5 | 1.5   | C29 H24 N5 O4 Cl2  |
|          | 576.1170   | 3.8  | 6.6  | -2.5 | 5.5   | C11 H32 N5 O17 Cl2 |
|          | 576.1264   | -5.6 | -9.7 | 10.5 | 1.4   | C22 H28 N5 O9 Cl2  |
|          | 576.1112   | 9.6  | 16.7 | 6.5  | 2.3   | C18 H28 N5 O12 Cl2 |

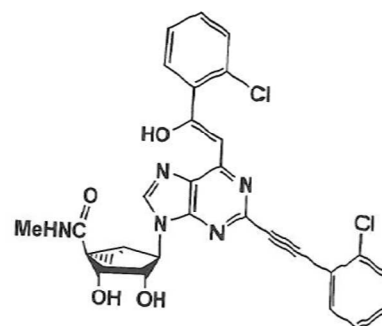

Compound 13

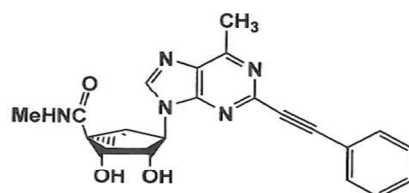

Compound 15

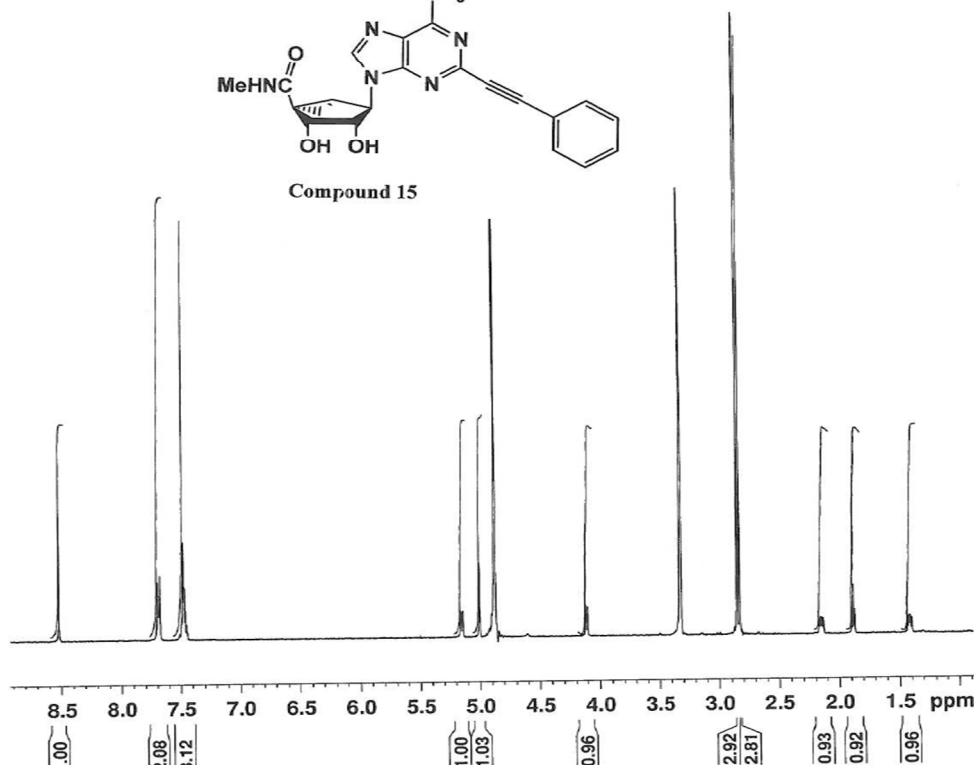

**BRUKER**

NAME DKT-IX-54-down  
 EXPNO 1  
 PROCNO 1  
 Date\_ 20130510  
 Time 14.25  
 INSTRUM spect  
 PROBHD 5 mm PABBO BB-  
 PULPROG zg30  
 TD 65536  
 SOLVENT MeOD  
 NS 4  
 DS 0  
 SWH 8223.685 Hz  
 FIDRES 0.125483 Hz  
 AQ 3.9846387 sec  
 RG 256  
 DW 60.800 usec  
 DE 6.50 usec  
 TE 297.6 K  
 D1 1.00000000 sec  
 TDO 1

----- CHANNEL f1 -----  
 NUC1 1H  
 P1 14.00 usec  
 PL1 0.00 dB  
 PL1W 11.75562859 W  
 SFO1 400.1604711 MHz  
 SI 32768  
 SF 400.1580000 MHz  
 WDW EM  
 SSB 0  
 LB 0.30 Hz  
 GB 0  
 PC 1.00

Monoisotopic Mass, Even Electron Ions  
 182 formula(e) evaluated with 3 results within limits (up to 50 closest results for each mass)  
 Elements Used:  
 C: 1-1000 H: 0-1000 N: 0-5 O: 0-5  
 22-Mar-2013 12:52:29  
 TOF MS ES+

dkf-ix-24-down 137 (2.331) AM (Cen,11, 30.00, Ht,10000.0,0.00,1.00); Sm (SG, 3x5.00)

1.58e+002

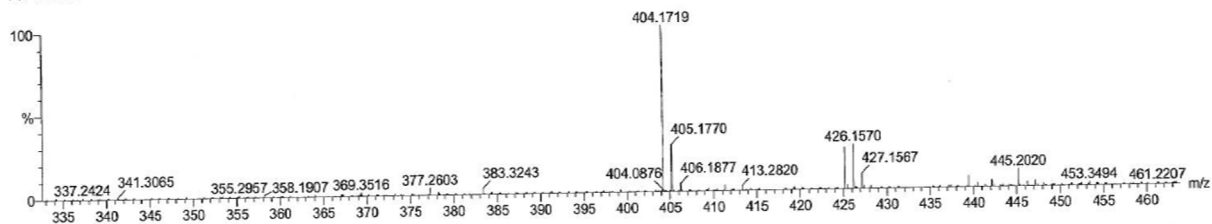

| Mass     | Calc. Mass | mDa  | PPM   | DBE  | i-FIT | Formula         |
|----------|------------|------|-------|------|-------|-----------------|
| 404.1719 | 404.1723   | -0.4 | -1.0  | 14.5 | 0.0   | C22 H22 N5 O3 ✓ |
|          | 404.1763   | -4.4 | -10.9 | 18.5 | 0.5   | C27 H22 N3 O    |
|          | 404.1651   | 6.8  | 16.8  | 18.5 | 0.8   | C28 H22 N O2    |

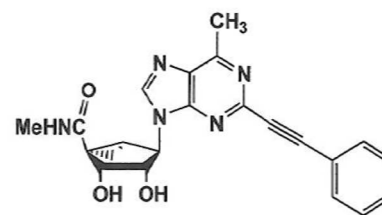

Compound 15

DKT-XIII-18-1

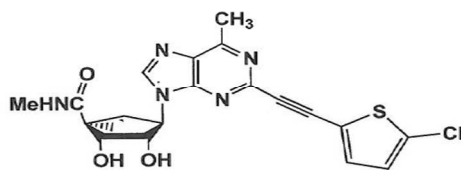

Compound 19

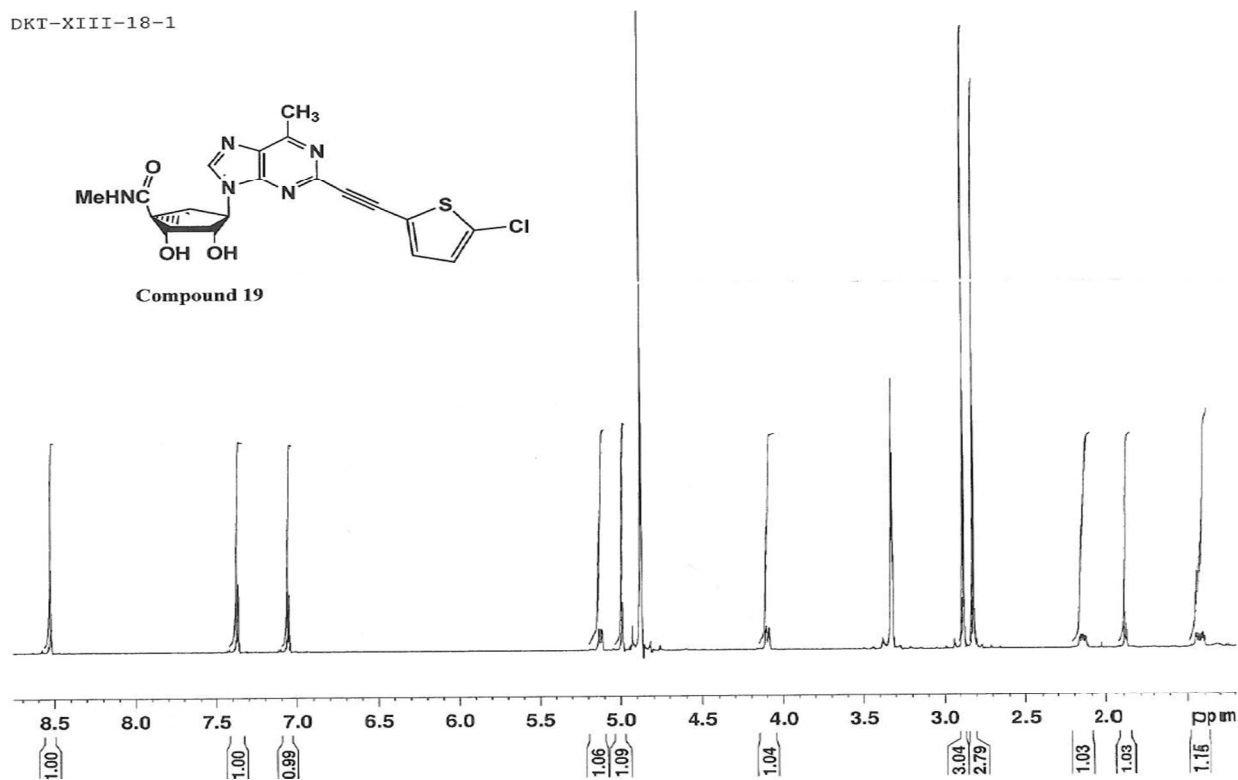

Monoisotopic Mass, Even Electron Ions  
 66 formula(e) evaluated with 7 results within limits (up to 19 closest results for each mass)  
 Elements Used:  
 C: 0-100 H: 0-200 N: 5-5 O: 0-30 35Cl: 1-1 32S: 1-1  
 18-Jun-2015  
 dkt-18jun15-xiii-18 75 (1.276) Cn (Cen,7, 50.00, Ar); Sm (SG, 1x2.00); Sb (12,5.00)

TOF MS ES+  
 1.01e+03

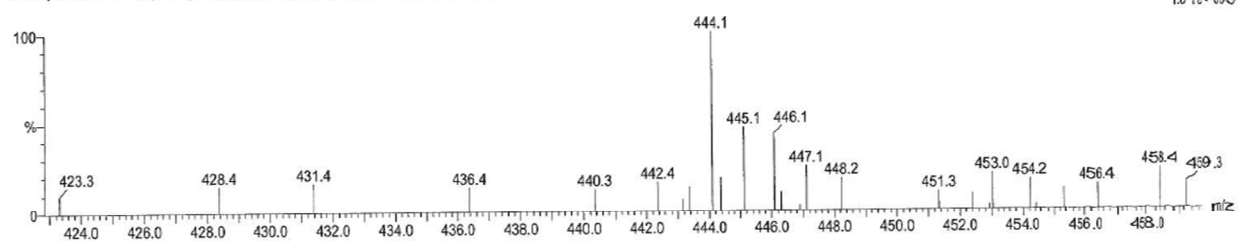

Minimum: -2.0  
 Maximum: 25.0 10.0 500.0

| Mass     | Calc. Mass | mDa   | PPM   | DBE  | i-FIT | Formula                  |
|----------|------------|-------|-------|------|-------|--------------------------|
| 444.0899 | 444.0897   | 0.2   | 0.5   | 13.5 | 225.7 | C20 H19 N5 O3 35Cl 32S ✓ |
|          | 444.0956   | -5.7  | -12.8 | 4.5  | 273.3 | C13 H23 N5 O8 35Cl 32S   |
|          | 444.0803   | 9.6   | 21.6  | 0.5  | 310.0 | C9 H23 N5 O11 35Cl 32S   |
|          | 444.1050   | -15.1 | -34.0 | 17.5 | 205.8 | C24 H19 N5 35Cl 32S      |
|          | 444.0745   | 15.4  | 34.7  | 9.5  | 261.5 | C16 H19 N5 O6 35Cl 32S   |
|          | 444.1108   | -20.9 | -47.1 | 8.5  | 252.3 | C17 H23 N5 O5 35Cl 32S   |
|          | 444.0686   | 21.3  | 48.0  | 18.5 | 224.5 | C23 H15 N5 O 35Cl 32S    |

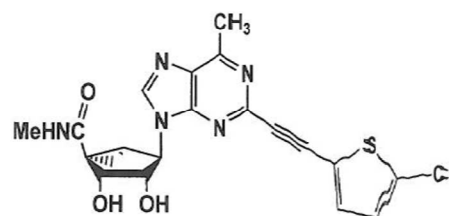

Compound 19

DKT-XIII-34

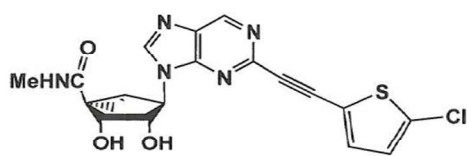

Compound 21

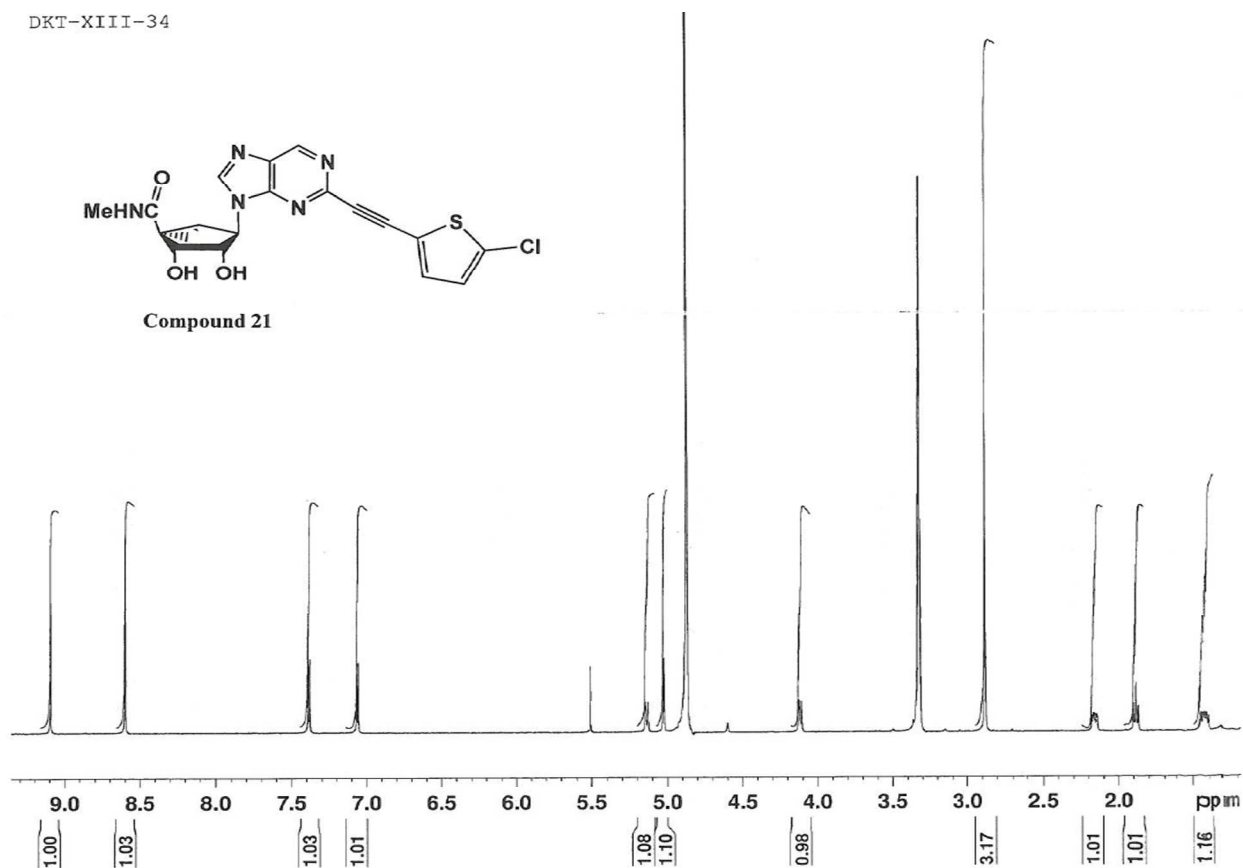

Monoisotopic Mass, Even Electron Ions

59 formula(e) evaluated with 7 results within limits (up to 19 closest results for each mass)

Elements Used:

C: 0-100 H: 0-200 N: 5-5 O: 0-30 S: 1-1 35Cl: 1-1

13-Jul-2015

dkt-13jul15-xiii-34 163 (2.778) Cn (Cen,7, 50.00, Ar); Sm (SG, 3x5.00); Sb (12,5.00)

TOF MS ES+  
2.66e+003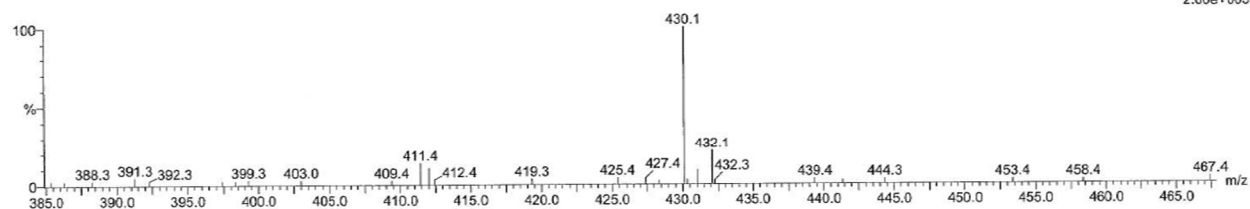

Minimum:

Maximum: 25.0 10.0 -2.0 500.0

| Mass     | Calc. Mass | mDa   | PPM   | DBE  | i-FIT | Formula              |
|----------|------------|-------|-------|------|-------|----------------------|
| 430.0734 | 430.0741   | -0.7  | -1.6  | 13.5 | 363.4 | C19 H17 N5 O3 S 35Cl |
|          | 430.0799   | -6.5  | -15.1 | 4.5  | 206.5 | C12 H21 N5 O8 S 35Cl |
|          | 430.0647   | 8.7   | 20.2  | 0.5  | 146.0 | C8 H21 N5 O11 S 35Cl |
|          | 430.0588   | 14.6  | 33.9  | 9.5  | 282.0 | C15 H17 N5 O6 S 35Cl |
|          | 430.0893   | -15.9 | -37.0 | 17.5 | 470.0 | C23 H17 N5 S 35Cl    |
|          | 430.0529   | 20.5  | 47.7  | 18.5 | 459.3 | C22 H13 N5 O S 35Cl  |
|          | 430.0952   | -21.8 | -50.7 | 8.5  | 313.6 | C16 H21 N5 O5 S 35Cl |

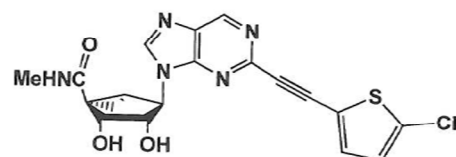

Compound 21



DKT-XIII-58

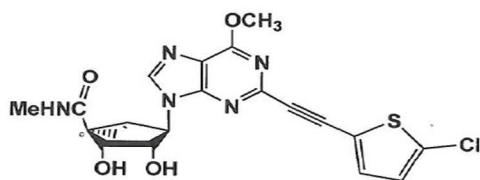

Compound 22

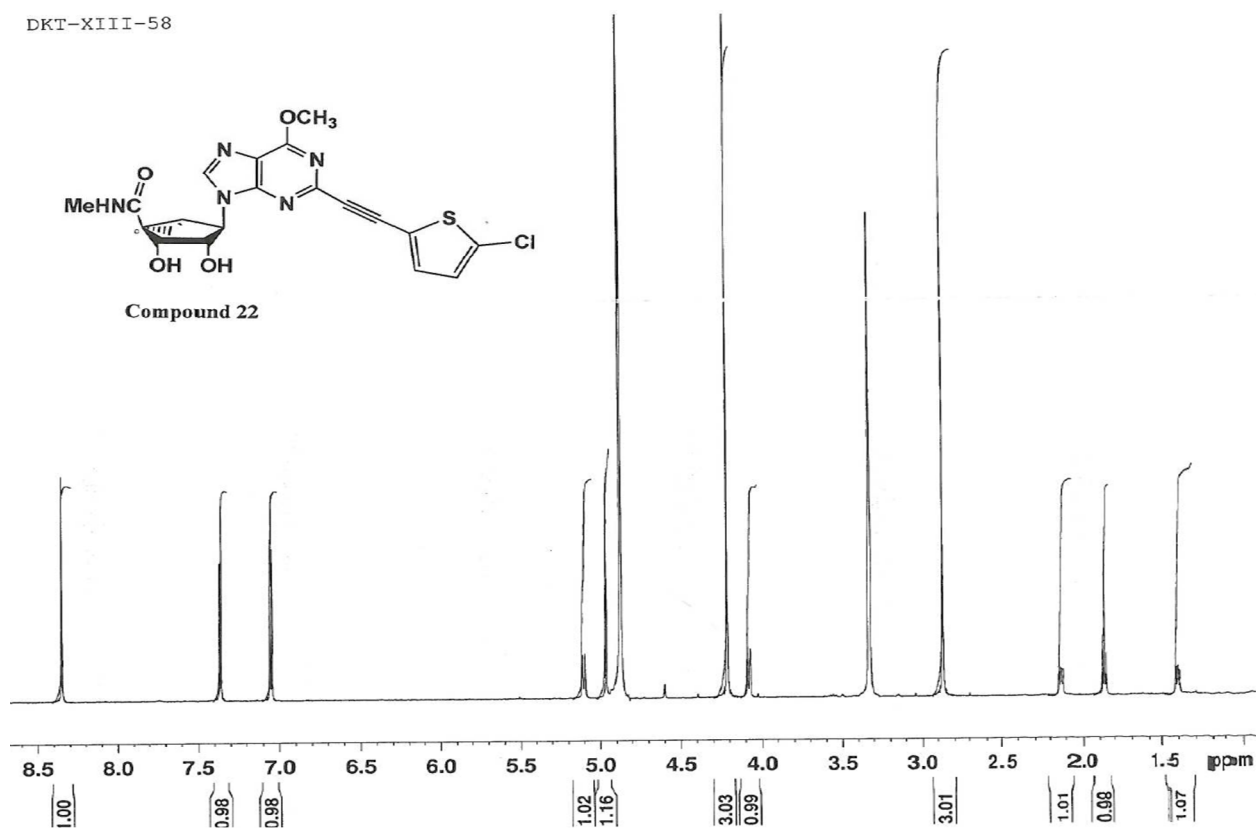

Monoisotopic Mass, Even Electron Ions  
 72 formula(e) evaluated with 3 results within limits (up to 19 closest results for each mass)  
 Elements Used:  
 C: 0-100 H: 0-200 N: 5-5 O: 0-40 32S: 1-1 35Cl: 1-1  
 14-Aug-2015  
 dkt-14aug15-xiii-58 67 (1.239) Cn (Cen,5, 50.00, Ar); Sm (SG, 1x2.00); Sb (12.5.00)

TOF MSES+  
 1.86e+003

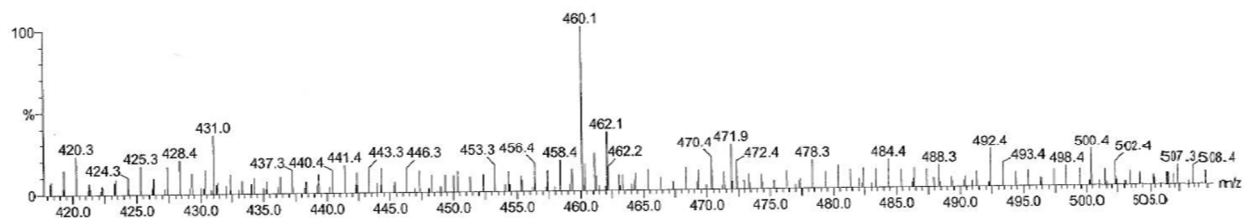

Minimum: -2.0  
 Maximum: 500.0

| Mass     | Calc. Mass | mDa  | PPM   | DBE  | i-FIT | Formula                |
|----------|------------|------|-------|------|-------|------------------------|
| 460.0852 | 460.0846   | 0.6  | 1.3   | 13.5 | 269.2 | C20 H19 N5 O4 32S 35Cl |
| 460.0905 | 460.0905   | -5.3 | -11.5 | 4.5  | 286.4 | Cl3 H23 N5 O9 32S 35Cl |
| 460.0752 | 460.0752   | 10.0 | 21.7  | 0.5  | 313.3 | C9 H23 N5 O12 32S 35Cl |

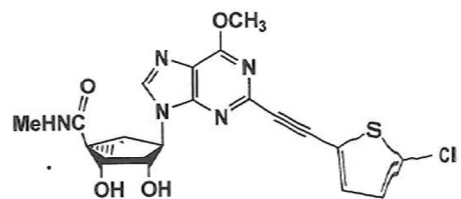

Compound 22
